# Supplementary material
Source: ML conference proceedings conference paper supplement (https://openreview.net/forum?id=QFYq0VwBCLE)
Supplement: supplementary_material [file attachment]

# Appendix: Online Inverse Reinforcement Learning with Learned Observation Model

**Saurabh Arora & Prashant Doshi**

THINC Lab, Dept. of Computer Science  
University of Georgia, Athens, GA  
United States of America  
{sa08751, pdoshi}@uga.edu

**Bikramjit Banerjee**

School of CSCE  
Univ. Southern Mississippi, Hattiesburg, MS  
United States of America  
Bikramjit.Banerjee@usm.edu

## Contents

|                                                |          |
|------------------------------------------------|----------|
| <b>Appendix A</b> . . . . .                    | <b>2</b> |
| Open-Source Code Links . . . . .               | 2        |
| Algorithm RIMEO . . . . .                      | 2        |
| <b>Appendix B</b> . . . . .                    | <b>3</b> |
| Proof of Lemma 1 . . . . .                     | 3        |
| Proof of Lemma 2 . . . . .                     | 3        |
| Proof of Theorem 1 . . . . .                   | 5        |
| <b>Appendix C (Onion Sorting)</b> . . . . .    | <b>6</b> |
| Reward Features . . . . .                      | 6        |
| Observation Features . . . . .                 | 6        |
| <b>Appendix D (Perimeter Patrol)</b> . . . . . | <b>7</b> |
| Reward Features . . . . .                      | 7        |
| Observation Features . . . . .                 | 7        |
| <b>References</b> . . . . .                    | <b>8</b> |

## Appendix A

### Open-Source Code Links

The MDP definitions for our two experimental domains are available at: [https://github.com/s-arora-1987/sorting\\_patrol\\_MDP\\_irl](https://github.com/s-arora-1987/sorting_patrol_MDP_irl).

RIMEO implementation is available at: [https://github.com/s-arora-1987/irl\\_d](https://github.com/s-arora-1987/irl_d).

Finally, the Gazebo simulation with Sawyer is available at: [https://github.com/thinclab/sawyer\\_irl\\_project](https://github.com/thinclab/sawyer_irl_project).

---

### Algorithm 1 RIMEO

---

```

1:  $WS$  (window size)  $\leftarrow 5$ ; max-restarts  $\leftarrow 5$ ;  $i \leftarrow 1$ ;  $\Xi_{d,1:i-1} \leftarrow \emptyset$ ;  $\hat{\phi}_{\theta^{i-1},k}^{1:i-1} \leftarrow 0$ ;  $[\theta^0]_k \sim$ 
   uniform(0, 1);  $P_{1:i-1}^*(\psi) \sim$  uniform(0, 1)
2: while  $std\_dev\_z > \rho$  do
3:    $P_{1:i}^* \leftarrow P_{1:i-1}^*$ 
4:   Compute  $\hat{O}_o$  using scores for  $\Xi_{d,i}$  from Eq. 8.
5:   repeat
6:     Compute  $\mathcal{L}'$ ,  $\nabla \mathcal{L}'$  using  $P_{1:i}^*(\psi)$  and  $\Xi_{d,i}$ .
7:      $P_{1:i}^*(\psi) \leftarrow$  update-step-LBFGS( $\mathcal{L}'$ ,  $\nabla \mathcal{L}'$ )
8:   until  $\|\nabla \mathcal{L}'\|_1 \approx 0$ 
9:   Update learned observation model using  $P_{1:i}^*$  in Eq. 7.
10:  repeat
11:    compute  $\hat{\phi}_{\theta^i}^i$  and  $\hat{\phi}_{\theta^i,k}^{1:i}$  using Eqs. 10, 11.
12:     $|\Xi_{d,1:i}| \leftarrow |\Xi_{d,1:i-1}| + |\Xi_{d,i}|$ 
13:     $\theta_0 \leftarrow \theta^{i-1}$ ,  $t \leftarrow 1$ 
14:    repeat
15:      Compute  $\pi_{E,(t-1)}^*$  using  $\theta_{(t-1)}$  and  $E_{\Xi}[\phi_k]$  using trajectories sampled from  $\pi_{E,(t-1)}^*$ .
16:       $z_{(t-1)} \leftarrow \hat{\phi}_{\theta^i}^{1:i} - E_{\Xi}[\phi]$  {gradient}
17:       $\theta_{t,k} \leftarrow \frac{\theta_{(t-1),k} \exp(-\eta z_{(t-1),k})}{\sum_{k=1}^K \theta_{(t-1),k} \exp(-\eta z_{(t-1),k})}$ 
18:       $t \leftarrow t + 1$ 
19:    until  $|z_t| \leq \varepsilon_r / (1 - \gamma)$ 
20:     $j \leftarrow j + 1$ 
21:  until  $j > \text{max-restarts}$ 
22:  Compute  $\hat{\pi}_i$  using learned reward  $\theta^i \leftarrow \theta_t$ .
23:   $i \leftarrow i + 1$  {next session}
24:   $z_i \leftarrow z_t$ ; mov-window-z  $\leftarrow [z_{i-WS}, \dots, z_i]$ 
25:   $std\_dev\_z \leftarrow \text{std-dev}(\text{mov-window-z})$ 

```

---

## Appendix B

### Proof of Lemma 1

LEMMA 1 (MONOTONICITY). *The demonstration likelihood increases monotonically with each new session,  $LL(\boldsymbol{\theta}^i|\Xi_{d,i}, \alpha_{1:i-1}, \boldsymbol{\theta}^{i-1}) - LL(\boldsymbol{\theta}^{i-1}|\Xi_{d,i-1}, \alpha_{1:i-2}, \boldsymbol{\theta}^{i-2}) \geq 0$ , when  $|\Xi_{d,1:i-1}| \gg |\Xi_{d,i}|$ .*

**Proof:** Log-likelihood of demonstrated behavior can be split as

$$\begin{aligned} & LL(\boldsymbol{\theta}^i|\Xi_{d,i}, \alpha_{1:i-1}, \boldsymbol{\theta}^{i-1}) \\ &= \sum_{\xi' \in \Xi_{d,1:i}} \tilde{P}(\xi') \log P(\xi'; \boldsymbol{\theta}) \\ &= \sum_{\xi' \in \Xi_{d,1:i}} \tilde{P}(\xi') \sum_{\xi \in \Xi} P(\xi|\xi'; \boldsymbol{\theta}^i) \log P(\xi, \xi'; \boldsymbol{\theta}) + \left( - \sum_{\xi' \in \Xi_{d,1:i}} \tilde{P}(\xi') \sum_{\xi \in \Xi} P(\xi|\xi'; \boldsymbol{\theta}^i) \log P(\xi|\xi'; \boldsymbol{\theta}) \right) \\ &= Q(\Xi_{d,1:i}, \boldsymbol{\theta}^i) + C(\Xi_{d,1:i}, \boldsymbol{\theta}^i) \end{aligned}$$

Here  $\tilde{P}$  is distribution of trajectories in observed training data ( $\sum_{\xi' \in \Xi_{d,1:i}} \tilde{P}(\xi')[\cdot]$  and  $\frac{1}{|\Xi_{d,1:i}|} \sum_{\xi' \in \Xi_{d,1:i}} [\cdot]$

can be used interchangeably). The EM method maximizes the log-likelihood by maximizing only  $Q$  value over  $\boldsymbol{\theta}$ ; and  $\boldsymbol{\theta} = \boldsymbol{\theta}^i$  maximizes  $Q(\Xi_{d,1:i}, \boldsymbol{\theta}^i)$  ([1]). After all the EM iterations for current session  $i$ , the final  $Q$  value is  $Q(\Xi_{d,1:i}, \boldsymbol{\theta}^i)$ . Therefore, the difference in the likelihoods achieved by weights learned in consecutive sessions can be expressed as a difference in  $Q$  values. Note that Robust IRL learns reward weights by inferring the maximum entropy distribution  $P(\xi, \xi'; \boldsymbol{\theta}) = \frac{\exp(\sum_k \theta_k f_k(\xi))}{\Omega_{\boldsymbol{\theta}}}$  (Equation 15 in [2]), where  $\Omega_{\boldsymbol{\theta}} = \sum_{\xi \in \Xi} \exp(\sum_k \theta_k f_k(\xi))$ . Expand  $Q$  value as

$$\begin{aligned} Q(\Xi_{d,1:i}, \boldsymbol{\theta}^i) &= \sum_{\xi' \in \Xi_{d,1:i}} \tilde{P}(\xi') \sum_{\xi \in \Xi} P(\xi|\xi'; \boldsymbol{\theta}^i) \log \left( \frac{\exp(\sum_k \theta_k^i f_k(\xi))}{\Omega_{\boldsymbol{\theta}^i}} \right) = \sum_k \theta_k^i \cdot \sum_{\xi' \in \Xi_{d,1:i}} \tilde{P}(\xi') \sum_{\xi \in \Xi} \\ & P(\xi|\xi'; \boldsymbol{\theta}^i) f_k(\xi) - \log \Omega_{\boldsymbol{\theta}^i} = \sum_k \theta_k^i \cdot \hat{\phi}_{\boldsymbol{\theta}^i, k}^{1:i} - \log \Omega_{\boldsymbol{\theta}^i}. \end{aligned}$$

Therefore the improvement in log likelihood over session  $i$  is

$$\begin{aligned} & LL(\boldsymbol{\theta}^i|\Xi_{d,i}, \alpha_{1:i-1}, \boldsymbol{\theta}^{i-1}) - LL(\boldsymbol{\theta}^{i-1}|\Xi_{d,i-1}, \alpha_{1:i-2}, \boldsymbol{\theta}^{i-2}) \\ &= Q(\Xi_{d,1:i}, \boldsymbol{\theta}^i) - Q(\Xi_{d,1:i-1}, \boldsymbol{\theta}^{i-1}) \\ &= \sum_k \theta_k^i \hat{\phi}_{\boldsymbol{\theta}^i, k}^{1:i} - \log \Omega_{\boldsymbol{\theta}^i} - \sum_k \theta_k^{i-1} \hat{\phi}_{\boldsymbol{\theta}^{i-1}, k}^{1:i-1} + \log \Omega_{\boldsymbol{\theta}^{i-1}} \\ &= \log \frac{\Omega_{\boldsymbol{\theta}^{i-1}}}{\Omega_{\boldsymbol{\theta}^i}} + \sum_k \left( \theta_k^i \frac{|\Xi_{d,1:i-1}|}{|\Xi_{d,i}| + |\Xi_{d,1:i-1}|} - \theta_k^{i-1} \right) \hat{\phi}_{\boldsymbol{\theta}^{i-1}, k}^{1:i-1} + \sum_k \left( \theta_k^i \frac{1}{|\Xi_{d,i}| + |\Xi_{d,1:i-1}|} \hat{\phi}_{\boldsymbol{\theta}^i, k}^i \right) \end{aligned}$$

(substitute  $\hat{\phi}_{\boldsymbol{\theta}^i, k}^{1:i}$  using Eq. 11 from main paper and simplifying)

The final expression is minimized only for  $\boldsymbol{\theta}^i = \boldsymbol{\theta}^{i-1}$  when  $|\Xi_{d,1:i-1}| \gg |\Xi_{d,i}|$ , i.e., when a significant amount of training data has been accumulated. The expression is also concave in parameter  $\boldsymbol{\theta}^i$ . Therefore,  $LL(\boldsymbol{\theta}^i|\Xi_{d,i}, \alpha_{1:i-1}, \boldsymbol{\theta}^{i-1}) - LL(\boldsymbol{\theta}^{i-1}|\Xi_{d,i-1}, \alpha_{1:i-2}, \boldsymbol{\theta}^{i-2}) \geq 0$  for consecutive sessions thereafter.  $\square$

### Proof of Lemma 2

LEMMA 2 (CONSTRAINT BOUND). *Under the assumptions stated in Sec. 5.2 (main paper), the following holds with probability at least  $\max(0, 1 - \delta_r)$ :*

$$\left| (1 - \gamma)(E_{\Xi}[\phi_k] - \hat{\phi}_{\boldsymbol{\theta}^i, k}^{1:i}) \right|_1 \leq \varepsilon_r, k \in \{1, 2, \dots, K\}$$

where  $L$  is the maximum length of any trajectory,  $\delta_r = \delta + \delta_s + \delta_o$  and  $\varepsilon_r = \varepsilon + \varepsilon_s + L|\Psi|\varepsilon_o$ , and  $\varepsilon, \delta$  are as defined in Theorem 1 in [3].

**Proof:** Suppose the true (unknown) observation model  $\forall o, g$  is  $O_{o,g}^*$ . Solving the NLP with the true observation model gives the true  $P(\psi)$ , since the constraint below is satisfied.

$$\prod_{\psi^{o,g}=1} P(\psi) \prod_{\psi^{o,g}=0} (1 - P(\psi)) = O_{o,g}^* \quad (1)$$

Using these true  $P(\psi)$  instead of  $P^*(\psi)$ , we can generate a version of Eq. 11 (main paper):

$$\phi_{\theta,k}^{1:i} = \frac{1}{|\Xi_{d,1:i}|} \sum_{\xi' \in \Xi_{d,1:i}} \sum_{\xi \in \Xi} \eta P(\xi'|\xi) P(\xi; \theta) f_k(\xi)$$

From the accumulated sessions, we get estimates of  $O_{o,g}^*$ , call it  $\hat{O}_{o,g}$  (Eq. 8 in the main paper). We assume that this estimate satisfies Hoeffding bounds for *the observed state-action pairs*, viz.,  $P(|O_{o,g}^* - \hat{O}_{o,g}| \leq \epsilon_o) \geq 1 - \frac{\delta_o}{K}$ , where  $\delta_o = 2K|\Psi| \exp(-2\epsilon_o^2 n_o)$ ,  $n_o$  being the number of samples used to construct  $\hat{O}_{o,g}$ . The key issue is that this estimate may not be available yet for the  $\langle s, a \rangle_o$  pairs that were not observed. Regardless, we assume that all features in  $\Psi$  are observed in the very first session. Hence, after solving the NLP, we obtain  $\hat{O}_{o,g}$  for *all*  $o, g$ , using the  $P^*(\psi)$  from observed  $\langle s, a \rangle_o$ s and

$$\hat{O}_{o,g} = \prod_{\psi^{o,g}=1} P^*(\psi) \prod_{\psi^{o,g}=0} (1 - P^*(\psi)) \quad (2)$$

Under the assumptions above, with probability  $\geq 1 - \delta_o$ ,  $\max_{\langle s, a \rangle_o} |O_{o,g}^* - \hat{O}_{o,g}| \leq \epsilon_o$ , but only for the observed  $\langle s, a \rangle_o$ . Since  $\max_{any \psi} |P(\psi) - P^*(\psi)| \leq 1$ , in turn this yields  $\max_{any \langle s, a \rangle_o} |O_{o,g}^* - \hat{O}_{o,g}| \leq |\Psi| \epsilon_o$ . Consequently, if the length of trajectories is bounded by  $L$ , then with probability  $\geq 1 - \frac{\delta_o}{K}$  we have  $\forall k$

$$\begin{aligned} |\phi_{\theta^i,k}^{1:i} - \hat{\phi}_{\theta^i,k}^{1:i}| &= \frac{1}{|\Xi_{d,1:i}|} \sum_{\xi' \in \Xi_{d,1:i}} \sum_{\xi \in \Xi} f_k(\xi) \eta P(\xi; \theta) |P(\xi'|\xi) - P^*(\xi'|\xi)| \\ &= \frac{1}{|\Xi_{d,1:i}|} \sum_{\xi' \in \Xi_{d,1:i}} \sum_{\xi \in \Xi} f_k(\xi) \eta P(\xi; \theta) \left| \prod_{o,g} O_{o,g}^* - \prod_{o,g} \hat{O}_{o,g} \right| \\ &\leq \frac{1}{|\Xi_{d,1:i}|} \sum_{\xi' \in \Xi_{d,1:i}} \sum_{\xi \in \Xi} f_k(\xi) \eta P(\xi; \theta) L \max_{any o} |O_{o,g}^* - \hat{O}_{o,g}| \\ &\leq L|\Psi| \epsilon_o / (1 - \gamma) \end{aligned}$$

The rest of the proof follows similar steps as in [3]. We define the events  $A_k, B_l, C_j$  as:

$$A_k : (1 - \gamma) |E_{\Xi}[\phi_k] - \hat{\phi}_k^{1:i}| > \varepsilon, k \in \{1, 2 \dots K\}.$$

Applying Hoeffding's inequality for  $A_k$ , we get  $P(A_k) \leq 2 \exp(-2\varepsilon^2 |\Xi_{d,1:i}|) \leq \frac{\delta}{K}$  for any  $k \in \{1, 2 \dots K\}$ , and for the same  $\varepsilon, \delta$  as in Theorem 1. Similarly, for noisy observation, given  $\varepsilon_s$  as the bound on the error in sampling based approximation of  $\hat{\phi}_l^{1:i}$  as  $\phi_{\theta^i,l}^{1:i}$ , and  $n_s$  samples, let us define the event

$$B_l : (1 - \gamma) \left| \hat{\phi}_l^{1:i} - \phi_{\theta^i,l}^{1:i} \right| > \varepsilon_s, l \in \{1, 2 \dots K\}.$$

Similar to procedure for  $P(A_k)$ , applying Hoeffding bound gives us  $P(B_l) < \frac{\delta_s}{K}, \delta_s = 2K \exp(-2\varepsilon_s^2 n_s)$ . Finally,

$$C_j : (1 - \gamma) \left| \phi_{\theta^i,j}^{1:i} - \hat{\phi}_{\theta^i,j}^{1:i} \right| > L|\Psi| \varepsilon_o, j \in \{1, 2 \dots K\}. \text{ Then following the argument above, } P(C_j) < \frac{\delta_o}{K}.$$

Applying Fretchets inequality over the sets A, B, and C of events gives us:

$$P((\cup_k A_k) \vee (\cup_l B_l) \vee (\cup_j C_j)) < \min(1, \sum_{k=1}^K \frac{\delta}{K} + \sum_{l=1}^K \frac{\delta_s}{K} + \sum_{j=1}^K \frac{\delta_o}{K}) = \min(1, \delta + \delta_s + \delta_o).$$

That is,  $P(\exists k, l, j \text{ s.t. } A_k \vee B_l \vee C_j) < \min(1, \delta + \delta_s + \delta_o)$ . Taking complement,  $P(\forall k, l, j, \bar{A}_k \wedge \bar{B}_l \wedge \bar{C}_j) \geq \max(0, 1 - \delta - \delta_s - \delta_o)$ . But  $\forall k, l, j, \bar{A}_k \wedge \bar{B}_l \wedge \bar{C}_j$  implies that  $\forall k$ :

$$(1 - \gamma) \left( |E_{\Xi}[\phi_k] - \hat{\phi}_k^{1:i}| + \left| \hat{\phi}_k^{1:i} - \phi_{\theta^i,k}^{1:i} \right| + \left| \phi_{\theta^i,k}^{1:i} - \hat{\phi}_{\theta^i,k}^{1:i} \right| \right) \leq \varepsilon + \varepsilon_s + L|\Psi| \varepsilon_o.$$

Hence  $P(\forall k, (1 - \gamma) \left( |E_{\Xi}[\phi_k] - \hat{\phi}_k^{1:i}| + \left| \hat{\phi}_k^{1:i} - \phi_{\theta^i,k}^{1:i} \right| + \left| \phi_{\theta^i,k}^{1:i} - \hat{\phi}_{\theta^i,k}^{1:i} \right| \right) \leq \varepsilon + \varepsilon_s + L|\Psi| \varepsilon_o) \geq \max(0, 1 - \delta - \delta_s - \delta_o)$ .

Using  $|E_{\Xi}[\phi_k] - \hat{\phi}_{\theta^i, k}^{1:i}| \leq |E_{\Xi}[\phi_k] - \hat{\phi}_k^{1:i}| + |\hat{\phi}_k^{1:i} - \phi_{\theta^i, k}^{1:i}| + |\phi_{\theta^i, k}^{1:i} - \hat{\phi}_{\theta^i, k}^{1:i}|$ ,  $\delta_r = \delta + \delta_s + \delta_o$ , and  $\varepsilon_r = \varepsilon + \varepsilon_s + L|\Psi|\varepsilon_o$ , we get:

$$P\left(\forall k, (1 - \gamma)(|E_{\Xi}[\phi_k] - \hat{\phi}_{\theta^i, k}^{1:i}|) \leq \varepsilon_r\right) \geq \max(0, 1 - \delta_r). \quad \square$$

### Proof of Theorem 1

**THEOREM 1 (CONFIDENCE).** *Let  $\varepsilon_r, \delta_r$  be as defined in Lemma 2, and  $\theta^i$  be the solution of session  $i$  for RI2RL-MEOM. Then*

$$LL(\theta_E | \Xi_{d,1:i}) - LL(\theta^i | \Xi_{d,i}, \alpha_{1:i-1}, \theta^{i-1}) \leq \frac{2K\varepsilon_r}{(1 - \gamma)},$$

with confidence at least  $\max(0, 1 - \delta_r)$ , where  $\theta_E$  are the true weights of the expert.

**Proof:** Each session of RI2RL-MEOM solves a maximum entropy estimation problem for Robust IRL. By allowing a relaxation in the constraints for a session, we get

$$\begin{aligned} & \max_{\Delta} \left( - \sum_{\xi' \in \Xi_{d,1:i}, \xi \in \Xi} P(\xi', \xi) \log P(\xi', \xi) \right) \\ & \text{subject to } \sum_{\xi' \in \Xi_{d,1:i}, \xi \in \Xi} P(\xi', \xi) = 1 \\ & |E_{\Xi}[\phi_k] - \hat{\phi}_{\theta^i, k}^{1:i}| \leq \beta_k \quad \forall k \end{aligned} \quad (3)$$

where

$$E_{\Xi}[\phi_k] \triangleq \sum_{\xi \in \Xi, \xi' \in \Xi_{d,1:i}} P(\xi, \xi') f_k(\xi), \quad k = 1 \dots K \quad (4)$$

Here  $\beta \in \mathbb{R}^K$  is a vector of upper bounds on the differences between feature expectations. Following the proofs by Dudik et al. [4], the above relaxed constraints problem is the same as  $\min_{\theta} (-\sum_{\xi \in \Xi_{d,1:i}} \tilde{P}(\xi) \log P(\xi|\theta) + \sum_k \beta_k |\theta_k|) = \min_{\theta} (-LL(\theta | \Xi_{d,i}, \alpha_{1:i-1}, \theta^{i-1}) + \sum_k \beta_k |\theta_k|) = \min_{\theta} NLL_{\beta}(\theta | \Xi_{d,i}, \alpha_{1:i-1}, \theta^{i-1})$  (say). Here  $NLL$  = negative log likelihood.

The proof here is partially inspired from Corollary 1 in [4]. Let  $\beta_k = \beta_c = \varepsilon/(1 - \gamma)$  for all  $k \in \{1 \dots K\}$ , where  $\beta_c$  is a constant because  $\varepsilon$  is a fixed input. For normalized exponentiated gradient descent used in reward-learning part of RI2RL session,  $\sum_1^K |\theta_k| = 1$ . Then,  $NLL_{\beta}(\theta | \Xi_{d,i}, \alpha_{1:i-1}, \theta^{i-1}) = (-LL(\theta | \Xi_{d,i}, \alpha_{1:i-1}, \theta^{i-1}) + \beta_c \sum_1^K |\theta_k|) = (-LL(\theta | \Xi_{d,i}, \alpha_{1:i-1}, \theta^{i-1}) + \beta_c)$ . Assume that  $\theta^i$  minimizes  $NLL_{\beta}(\theta | \Xi_{d,i}, \alpha_{1:i-1}, \theta^{i-1})$ , a solution maximizing  $LL(\theta | \Xi_{d,i}, \alpha_{1:i-1}, \theta^{i-1})$ .

Since  $E_{\Xi}[\phi_k] \in [0, \frac{1}{(1-\gamma)}]$ , we get  $(1 - \gamma)E_{\Xi}[\phi_k] \in [0, 1]$ . Using the result from the previous

Lemma, the probability that  $|(1 - \gamma)E_{\Xi}[\phi_k] - (1 - \gamma)\hat{\phi}_{\theta^i, k}^{1:i}| \leq \varepsilon_r \forall k \in \{1 \dots K\}$  is at least  $\max(0, 1 - \delta_r)$ . To keep the reward value bounded, IRL assumes  $\|\theta^*\|_1 \leq 1$  for all  $\theta^*$ . Using the assumption and Theorem 1 in [4], we get the following error bound:

$$\text{For every } \theta^* \in [0, 1]^K, NLL_{\beta}(\theta^i | \Xi_{d,i}, \alpha_{1:i-1}, \theta^{i-1}) - NLL_{\beta}(\theta^* | \Xi_{d,i}, \alpha_{1:i-1}, \theta^{i-1}) \leq 2 \sum_1^K \beta_c = 2K \beta_c = \frac{2K\varepsilon_r}{(1-\gamma)}, \text{ with probability at least } \max(0, 1 - \delta_r).$$

We modify the bound in the form of positive log-likelihood of expert's policy, by using the relation  $NLL_{\beta}(\theta^* | \Xi_{d,1:i}) = (-LL(\theta^* | \Xi_{d,1:i}) + \sum_1^K \beta_k |\theta_k|)$  and  $\theta^* = \theta_E$ .

Then, with  $\Xi_{d,1:i}$  as input, with probability at least  $\max(0, 1 - \delta_r)$ ,

$$\begin{aligned} & NLL_{\beta}(\theta^i | \Xi_{d,i}, \alpha_{1:i-1}, \theta^{i-1}) - NLL_{\beta}(\theta_E | \Xi_{d,1:i}) \\ & = LL(\theta_E | \Xi_{d,1:i}) - LL(\theta^i | \Xi_{d,i}, \alpha_{1:i-1}, \theta^{i-1}) \leq \frac{2K\varepsilon_r}{(1 - \gamma)}. \end{aligned}$$

□

## Appendix C (Features of Onion Sorting)

### Reward Features

The 11 reward features  $\phi_k(s, a)$  are:

- *CreateList*( $s, a$ ): Roll all onions and create a list of predictions (blemished/unblemished/unknown);
- *ClaimNewOnion*( $s, a$ ): considers a new onion on table;
- *PickUnknown*( $s, a$ ): is 1 when onion with unknown prediction is picked;
- *AvoidNoOp*( $s, a$ ): the action  $a$  changes the state;
- *InspectNewOnion*( $s, a$ ): is 1 when an onion is inspected for the first time and a prediction is made for it;
- *GoodOnTable*( $s, a$ ): considered onion is unblemished and is placed on the table;
- *BlemishedNotOnTable*( $s, a$ ): onion is blemished and is not placed on the table;
- *GoodNotInBin*( $s, a$ ): onion is unblemished and is not placed in the bin;
- *BlemishedInBin*( $s, a$ ): onion is blemished and is placed in the bin;
- *PickBlemished*( $s, a$ ): onion with prediction blemished is picked;
- *EmptyList*( $s, a$ ): finish sorting bad onions out of the conveyor.

### Observation Features

The 8 observation features,  $\psi_j, j = 1, \dots, 8$ , are listed below. Each indicator  $\psi_j^{o:g}$  takes the value 1 iff the predicate value is the same for both  $\langle s, a \rangle_g$  and  $\langle s, a \rangle_o$ .

- *BlemishedOnion*: considered onion is blemished;
- *MoveWithHand*: onion moves with the hand;
- *StartFromConv*: onion was on the table before action;
- *LeavingAtEye*: onion leaves atEye location;
- *OnionToBin*: onion moves to the bin;
- *HandToBin*: hand moves to the bin;
- *OnionToTable*: onion moves to the table;
- *HandToTable*: hand moves to the table;

## Appendix D (Features of Perimeter Patrol)

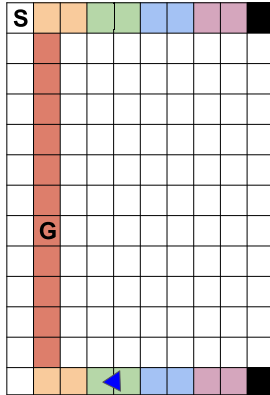

### Reward Features

The 6 reward features  $\phi_k(s, a)$ , in the context of the above figure, are:

- *HasMoved*( $s, a$ ): true iff  $a$  in  $s$  makes the patroller change its grid cell;
- *Turn1*( $s, a$ ): true iff  $a$  in  $s$  makes the patroller turn (left or right) in the orange part of the hallway;
- *Turn2*( $s, a$ ): true iff  $a$  in  $s$  makes the patroller turn in the yellow part of hallway;
- *Turn3*( $s, a$ ): true iff  $a$  in  $s$  makes the patroller turn in the green part of hallway;
- *Turn4*( $s, a$ ): true iff  $a$  in  $s$  makes the patroller turn in the blue part of hallway;
- *Turn5*( $s, a$ ): true iff  $a$  in  $s$  makes the patroller turn in the magenta part of hallway.

A weight vector  $\theta_E$  for these features such as  $\langle .57, 0, 0, 0, .43, 0 \rangle$  makes the patroller constantly execute a cyclic trajectory.

### Observation Features

The observation feature set  $\Psi$  contains the following 4 binary predicates:

- *MoveForward*: patroller is moving forward;
- *TurnLeft*: patroller is turning left;
- *y is 0*: patroller location has  $y = 0$ ;
- *TurnRight*: patroller is turning right;

Average of pairwise feature correlation from the patroller's demonstration is  $-0.14$  (p-value 0.06), indicating that the features are reasonably independent.

## References

- [1] S. Wang and D. Schuurmans Yunxin Zhao. The Latent Maximum Entropy Principle. *ACM Transactions on Knowledge Discovery from Data*, 6(8), 2012.
- [2] S. Shahryari and P. Doshi. Inverse Reinforcement Learning Under Noisy Observations. In *Proceedings of the 16th Conference on Autonomous Agents and MultiAgent Systems, AAMAS '17*, Richland, SC, 2017. International Foundation for Autonomous Agents and Multiagent Systems.
- [3] S. Arora, P. Doshi, and B. Banerjee. I2RL: Online inverse reinforcement learning under occlusion. *Autonomous Agents and Multi-Agent Systems*, 35(1):4, Nov 2020. ISSN 1573-7454.
- [4] M. Dudík, S. J. Phillips, and R. E. Schapire. Performance guarantees for regularized maximum entropy density estimation. In J. Shawe-Taylor and Y. Singer, editors, *Learning Theory*, pages 472–486, Berlin, Heidelberg, 2004. Springer Berlin Heidelberg. ISBN 978-3-540-27819-1.
